# Supplementary material for: Successive DNA extractions improve characterization of soil microbial communities
Source: PubMed Central journal article supplement (PMC5291099; doi:10.7717/peerj.2915), 2017-02-01
Supplement: peerj-05-2915-s001.pdf [file peerj-05-2915-s001.pdf]

# **Successive DNA extractions improve characterization of soil microbial communities**

Mauricio R. Dimitrov<sup>1,2\*</sup>, Annelies J. Veraart<sup>2</sup>, Mattias de Hollander<sup>2</sup>, Hauke Smidt<sup>1</sup>, Johannes A. van Veen<sup>2</sup>, Eiko E. Kuramae<sup>2</sup>

<sup>1</sup> Laboratory of Microbiology, Wageningen University, Wageningen, the Netherlands.

<sup>2</sup> Department of Microbial Ecology, Netherlands Institute of Ecology NIOO-KNAW, Wageningen, the Netherlands.

## **\* Corresponding author**

Mauricio R. Dimitrov

Phone: +31 317 473 496

Email: [m.dimitrov@nioo.knaw.nl](mailto:m.dimitrov@nioo.knaw.nl)

Postal address: the Netherlands Institute of Ecology (NIOO-KNAW),  
Droevendaalsesteeg 10, 6708 PB, the Netherlands.

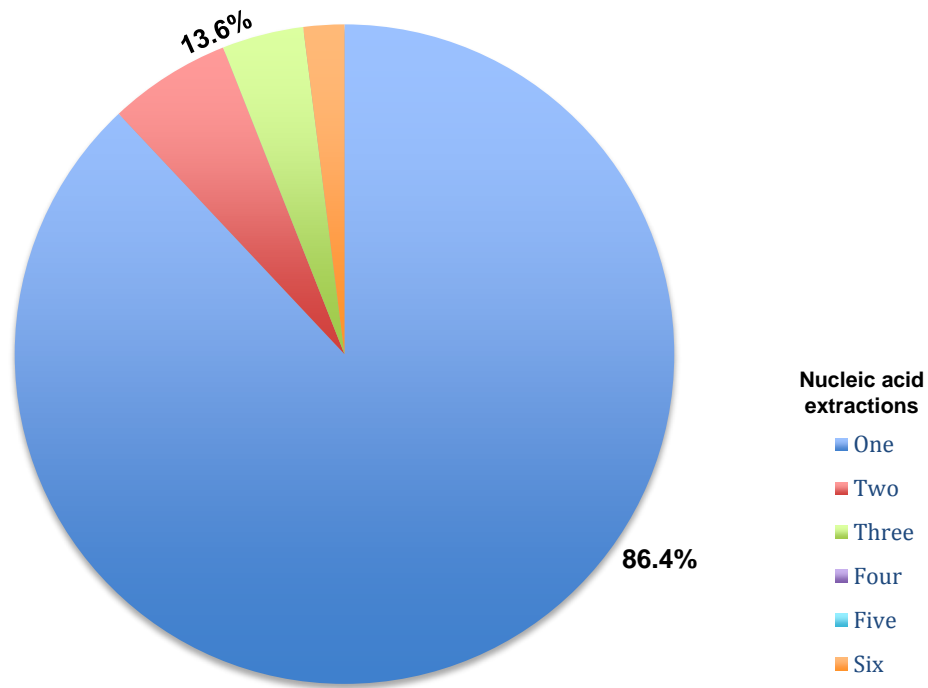

**Figure S1.** Analysis of fifty studies published in 2016 where one or multiple nucleic acid extractions were used to analyse soil microbial communities. Approximately 14% of the studies performed multiple acid nucleic extraction of the same soil sample. Data obtained by Web of Science search using topics: 'soil AND microb\*' and 'DNA OR RNA OR PCR OR metagen\* OR "16S" OR sequencing'. Search was refined by using the following Web of Science categories: 'SOIL SCIENCE' AND 'PUBLICATION YEARS' (2016). The chart represents the first fifty obtainable studies in alphabetical order.

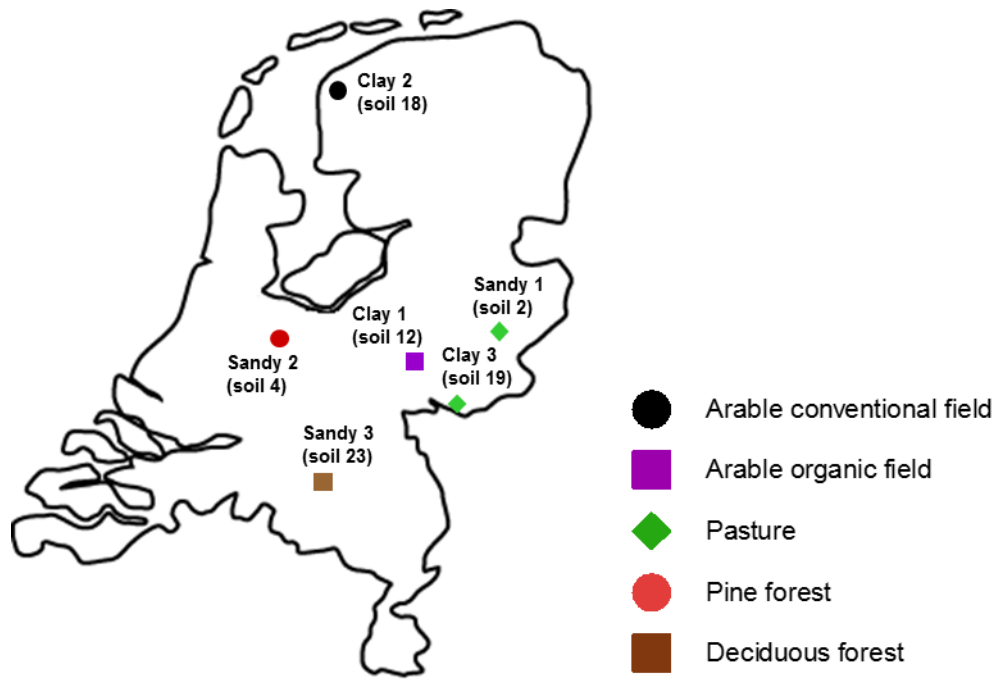

**Figure S2.** Overview of sampling locations and land management types of the soils used in the present work. For simplicity, samples have been renamed here. The identification, as found in Kuramae et al. (2012), is indicated between parentheses.

**Table S1.** Soil physical and chemical characteristics of the samples used in the present work.

| Field       | Land use                     | Latitude<br>(N) | Longitude<br>(E) | pH  | Total N<br>(%) | Total C<br>(%) | C:N<br>ratio | OM<br>(%) | Total P<br>(mg P <sub>2</sub> O <sub>5</sub><br>100g <sup>-1</sup> ) | Clay<br>(%) | Silt<br>(%) | Sand<br>(%) | CaCO <sub>3</sub><br>(%) | Cd<br>(mg<br>kg <sup>-1</sup> ) | Cr<br>(mg<br>kg <sup>-1</sup> ) | Cu<br>(mg<br>kg <sup>-1</sup> ) | Ni<br>(mg<br>kg <sup>-1</sup> ) | Pb<br>(mg<br>kg <sup>-1</sup> ) | Zn<br>(mg<br>kg <sup>-1</sup> ) | As<br>(mg<br>kg <sup>-1</sup> ) | Hg<br>(mg<br>kg <sup>-1</sup> ) |
|-------------|------------------------------|-----------------|------------------|-----|----------------|----------------|--------------|-----------|----------------------------------------------------------------------|-------------|-------------|-------------|--------------------------|---------------------------------|---------------------------------|---------------------------------|---------------------------------|---------------------------------|---------------------------------|---------------------------------|---------------------------------|
| sandy soils |                              |                 |                  |     |                |                |              |           |                                                                      |             |             |             |                          |                                 |                                 |                                 |                                 |                                 |                                 |                                 |                                 |
| Sandy 1     | Pasture                      | 52°14"          | 06°41"           | 6.1 | 0.25           | 2.3            | 9.2          | 4         | 197                                                                  | 1.1         | 6.8         | 91.9        | 0                        | 0.17                            | 6.9                             | 13                              | 0                               | 9.7                             | 28                              | 2.2                             | 0                               |
| Sandy 2     | Pine forest                  | 52°08"          | 05°11"           | 3.7 | 0.17           | 3.8            | 22.3         | 6.4       | 17                                                                   | 0.3         | 4.3         | 95.4        | 0                        | 0.1                             | 0                               | 0                               | 0                               | 15                              | 0                               | 1.8                             | 0.04                            |
| Sandy 3     | Deciduous<br>forest          | 51°32"          | 05°18"           | 3.7 | 0.28           | 5              | 17.8         | 9         | 49                                                                   | 4.3         | 9.8         | 85.9        | 0                        | 0.13                            | 8.2                             | 0                               | 3.8                             | 23                              | 12                              | 5                               | 0.09                            |
| clay soils  |                              |                 |                  |     |                |                |              |           |                                                                      |             |             |             |                          |                                 |                                 |                                 |                                 |                                 |                                 |                                 |                                 |
| Clay 1      | Organic arable<br>field      | 52°01"          | 06°12"           | 6.5 | 0.13           | 1.4            | 11.0         | 2.7       | 296                                                                  | 13.4        | 29.4        | 57.4        | 0.1                      | 0.21                            | 19                              | 15                              | 8.4                             | 21                              | 71                              | 10                              | 0.09                            |
| Clay 2      | Conventional<br>arable field | 53°12"          | 05°31"           | 7.4 | 0.13           | 1.2            | 9.3          | 1.6       | 106                                                                  | 16.1        | 37.9        | 46          | 2.4                      | 0.12                            | 29                              | 21                              | 14                              | 14                              | 41                              | 11                              | 0.03                            |
| Clay 3      | Pasture                      | 51°53"          | 06°17"           | 6   | 0.55           | 4.8            | 8.7          | 9.4       | 310                                                                  | 36.7        | 51.1        | 12.1        | 0.2                      | 0.49                            | 52                              | 27                              | 33                              | 32                              | 130                             | 14                              | 0.08                            |

**Table S2.** DNA yield ( $\mu\text{g}$  of DNA/g of soil) (SD) in successive extractions (E1-E3) for both kits in clay soils (A) and sandy soils (B). DNA quantification was performed using a Qubit 2.0 fluorometer.

**A**

| Extraction | clay 1     |              | clay 2     |            | clay 3      |              |
|------------|------------|--------------|------------|------------|-------------|--------------|
|            | PS         | FS           | PS         | FS         | PS          | FS           |
| E1         | 5.74(0.24) | 21.35(14.07) | 2.42(0.18) | 8.13(0.71) | 14.61(8.71) | 42.57(8.47)  |
| E2         | 3.05(0.25) | 9.90(4.18)   | 3.18(0.52) | 4.67(3.15) | 0.33(0.29)  | 28.49(2.75)  |
| E3         | 0.72(0.58) | 5.00(0.43)   | 2.03(0.17) | 6.95(1.28) | 0.34(0.28)  | 20.97(17.09) |

**B**

| Extraction | sandy 1     |             | sandy 2    |             | sandy 3    |              |
|------------|-------------|-------------|------------|-------------|------------|--------------|
|            | PS          | FS          | PS         | FS          | PS         | FS           |
| E1         | 11.53(1.01) | 31.90(8.36) | 3.64(0.34) | 10.68(2.62) | 3.43(0.81) | 12.00(8.68)  |
| E2         | 4.67(1.22)  | 18.15(0.11) | 1.90(0.04) | 5.02(1.41)  | 3.81(0.77) | 22.17(15.45) |
| E3         | 3.20(0.12)  | 8.62(0.49)  | 1.09(0.22) | 3.07(0.60)  | 1.94(0.09) | 5.12(1.29)   |

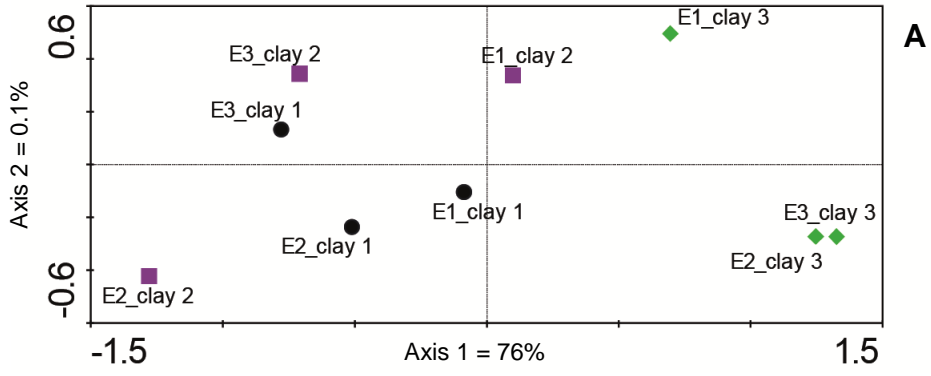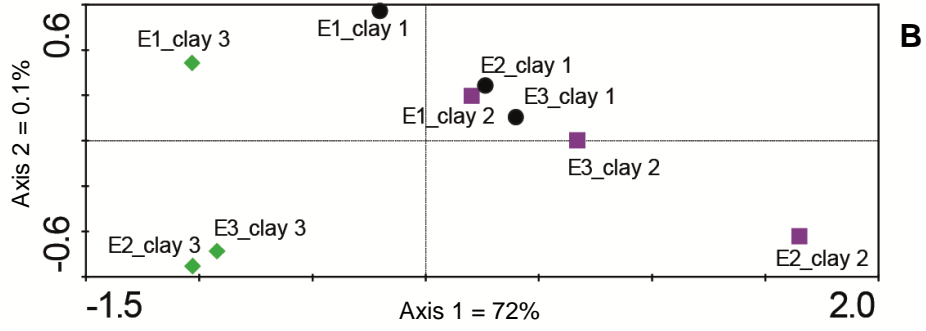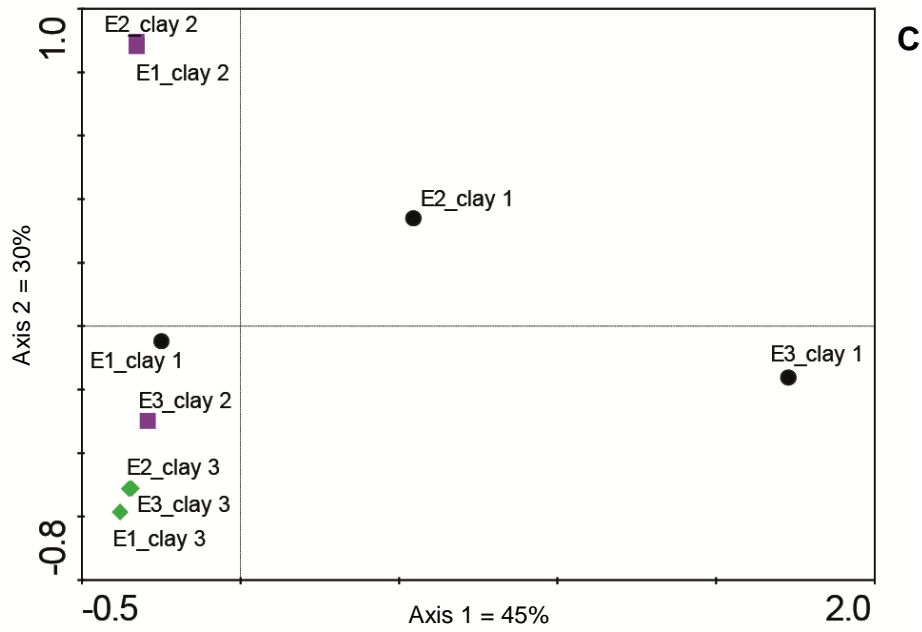

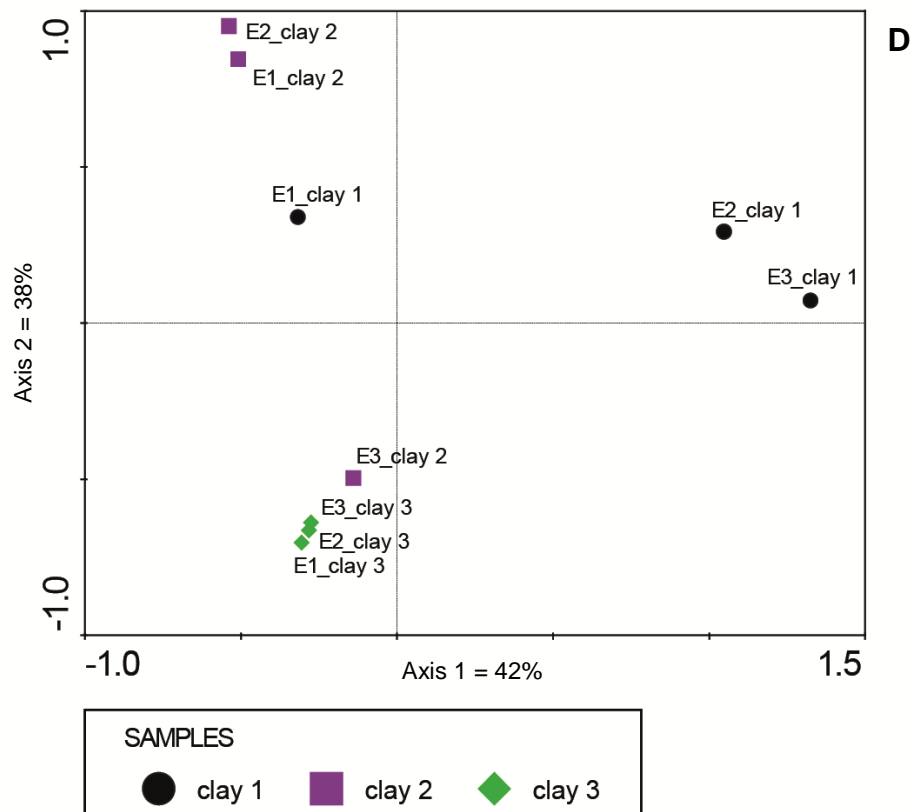

**Figure S3.** PCA plots of fungal community in clay soils analysed by T-RFLP. (A) total DNA extracted with PS and analysed using the forward primer; (B) total DNA extracted with PS and analysed using the reverse primer; (C) total DNA extracted with FS and analysed using the forward primer; (D) total DNA extracted with FS and analysed using the reverse primer.

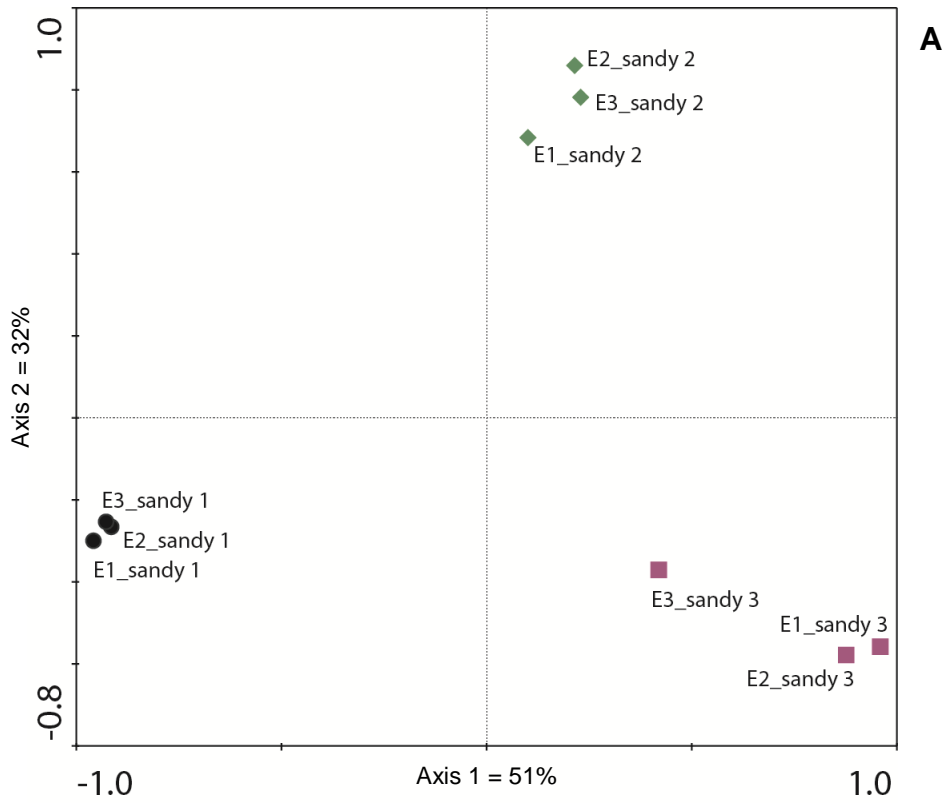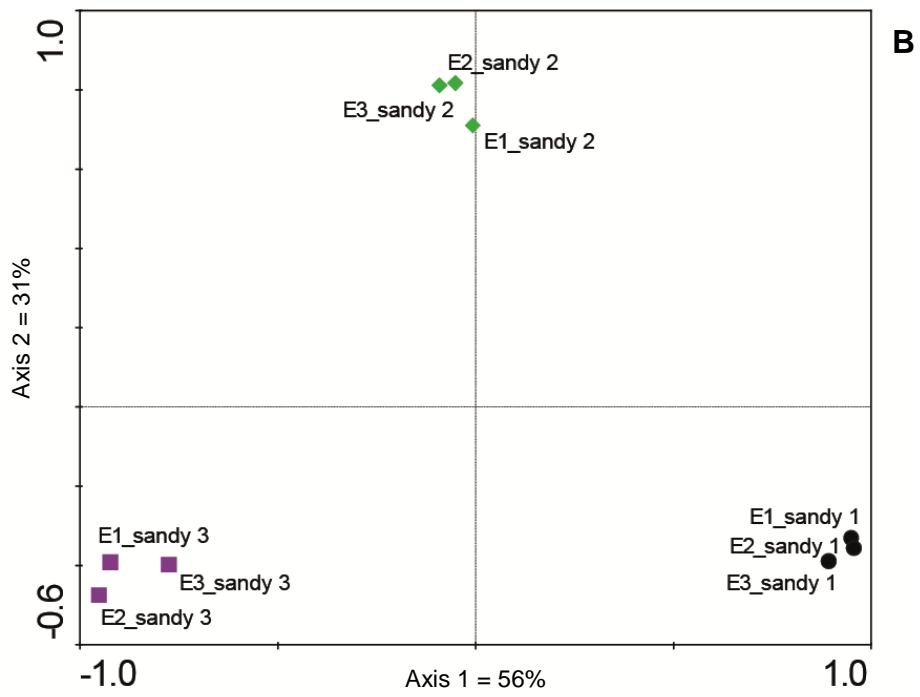



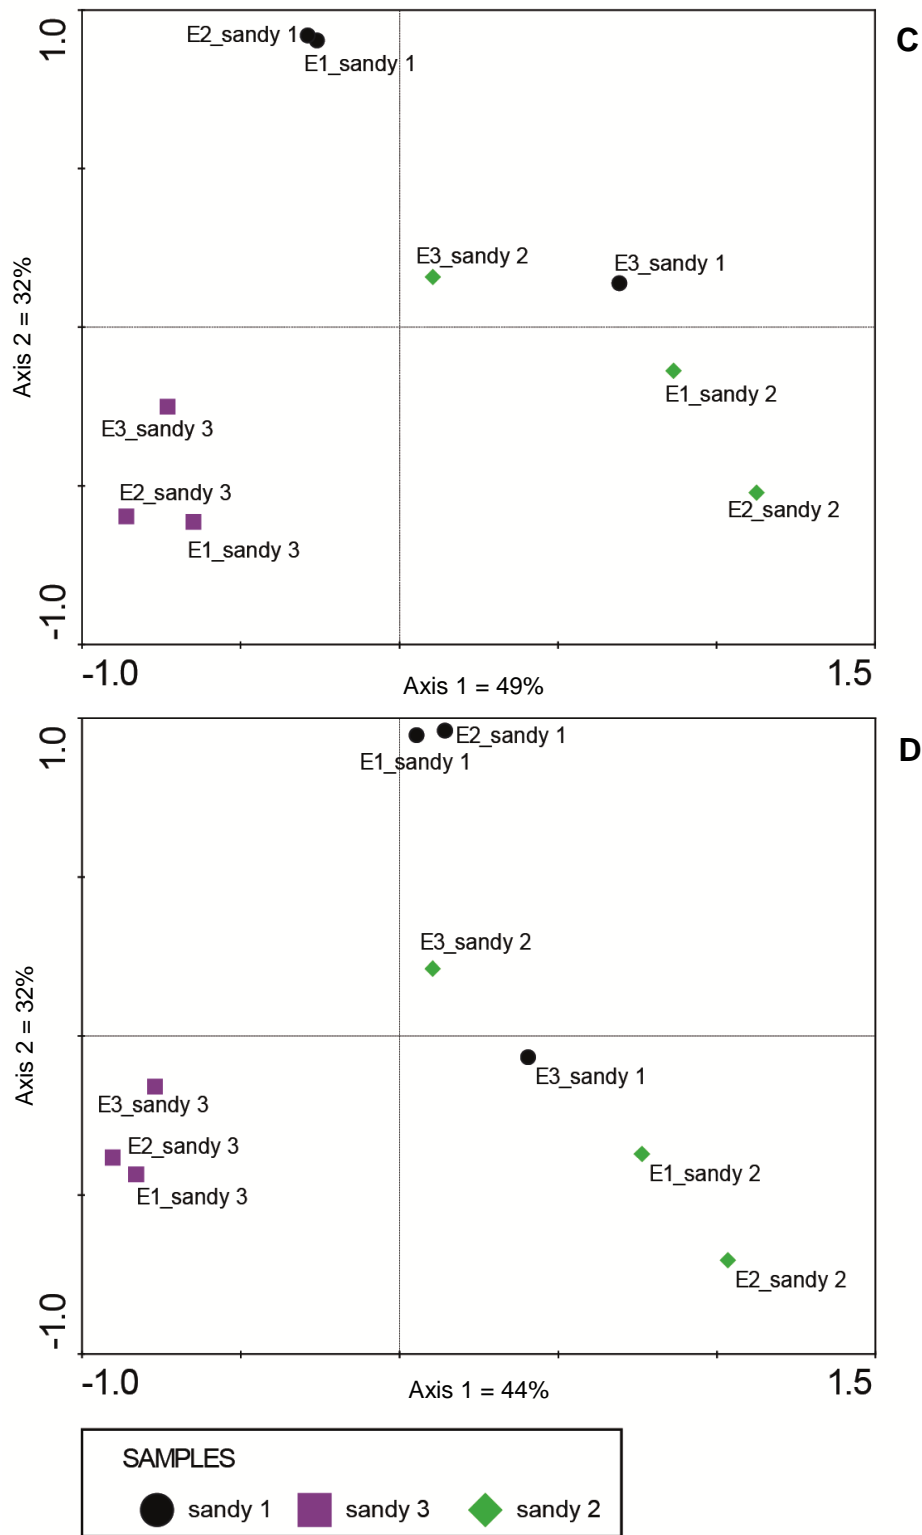

**Figure S4.** PCA plots of fungal community in sandy soils analysed by T-RFLP. (A) total DNA extracted with PS and analysed using the forward primer; (B) total DNA extracted with PS and analysed using the reverse primer; (C) total DNA extracted with FS and analysed using the forward primer; (D) total DNA extracted with FS and analysed using the reverse primer.

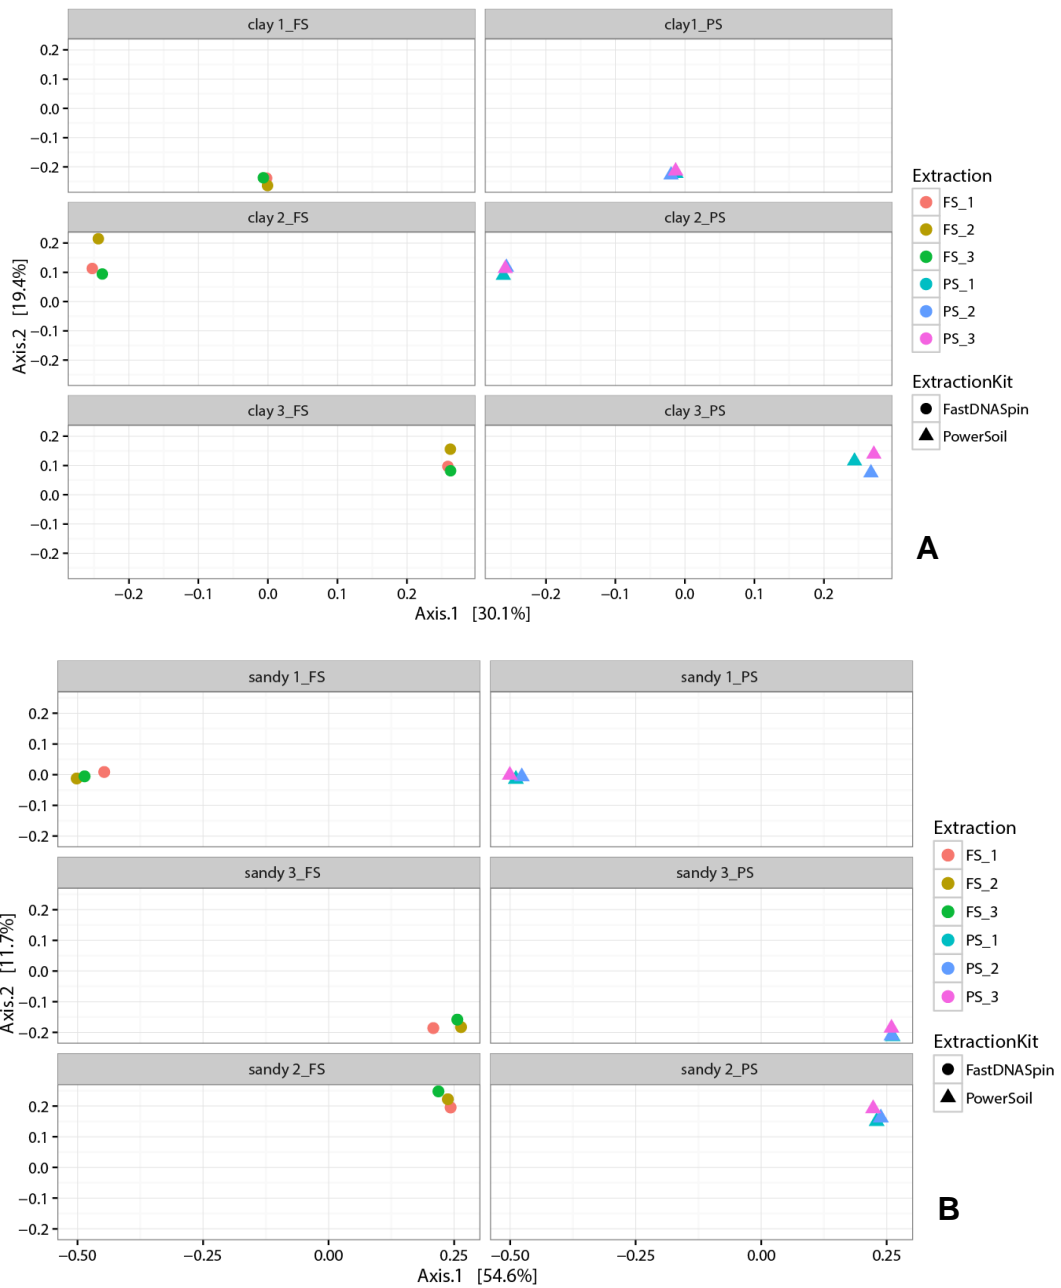

**Figure S5.** Multidimensional scaling (MDS) analysis of unweighted Unifrac values from prokaryotic community in clay (A) and sandy soils (B).

**Table S3.** Relative abundance of the ten most abundant bacterial Phyla in all clay (A) and sandy (B) soils.

| A | Taxa                       | PS    |       |       |       |       |       |       |       |       | FS    |       |       |       |       |       |       |       |       |
|---|----------------------------|-------|-------|-------|-------|-------|-------|-------|-------|-------|-------|-------|-------|-------|-------|-------|-------|-------|-------|
|   |                            | E1    | E2    | E3    | E1    | E2    | E3    | E1    | E2    | E3    | E1    | E2    | E3    | E1    | E2    | E3    | E1    | E2    | E3    |
|   |                            | clay1 | clay1 | clay1 | clay2 | clay2 | clay2 | clay3 | clay3 | clay3 | clay1 | clay1 | clay1 | clay2 | clay2 | clay2 | clay3 | clay3 | clay3 |
|   | Bacteria; Proteobacteria   | 28.93 | 17.92 | 24.58 | 22.19 | 18.06 | 16.75 | 17.39 | 18.70 | 17.66 | 24.78 | 24.04 | 21.85 | 16.59 | 9.46  | 14.67 | 11.22 | 10.05 | 10.49 |
|   | Bacteria; Actinobacteria   | 14.09 | 10.53 | 19.40 | 12.74 | 11.22 | 13.38 | 27.17 | 19.27 | 20.16 | 14.62 | 13.97 | 15.16 | 12.48 | 9.27  | 15.09 | 15.58 | 10.18 | 10.45 |
|   | Bacteria; Acidobacteria    | 12.06 | 14.88 | 13.42 | 17.11 | 18.96 | 15.97 | 10.30 | 15.01 | 10.79 | 14.34 | 11.69 | 8.76  | 21.28 | 24.24 | 16.00 | 11.41 | 10.14 | 5.85  |
|   | Bacteria; Verrucomicrobia  | 2.59  | 4.43  | 3.43  | 4.50  | 3.18  | 2.56  | 18.91 | 20.62 | 26.22 | 2.95  | 3.59  | 3.57  | 3.35  | 6.38  | 4.02  | 32.72 | 45.74 | 50.25 |
|   | Bacteria; Firmicutes       | 4.78  | 5.01  | 5.80  | 1.71  | 2.13  | 3.02  | 0.21  | 0.90  | 2.36  | 7.32  | 14.87 | 22.29 | 4.06  | 3.40  | 9.81  | 2.33  | 2.80  | 7.47  |
|   | Bacteria; Chloroflexi      | 4.80  | 8.76  | 8.99  | 7.60  | 8.78  | 11.62 | 8.41  | 6.61  | 6.57  | 4.98  | 5.46  | 4.77  | 9.72  | 17.82 | 10.72 | 6.72  | 6.04  | 3.17  |
|   | Bacteria; Planctomycetes   | 4.04  | 7.03  | 9.90  | 8.14  | 6.34  | 7.48  | 6.03  | 5.64  | 6.11  | 3.99  | 4.34  | 5.19  | 6.31  | 8.80  | 6.51  | 5.15  | 4.50  | 2.13  |
|   | Archaea; Thaumarchaeota    | 3.16  | 16.32 | 2.37  | 6.87  | 13.12 | 15.28 | 0.18  | 0.76  | 1.88  | 4.16  | 6.32  | 4.17  | 7.16  | 5.72  | 10.22 | 3.85  | 2.93  | 4.83  |
|   | Bacteria; Nitrospirae      | 1.58  | 1.92  | 2.11  | 2.08  | 2.58  | 2.19  | 2.56  | 5.99  | 3.40  | 2.40  | 1.70  | 1.01  | 2.99  | 5.88  | 2.14  | 3.92  | 3.36  | 1.08  |
|   | Bacteria; Gemmatimonadetes | 5.39  | 1.92  | 2.87  | 4.52  | 3.41  | 2.11  | 1.61  | 1.27  | 0.84  | 3.46  | 1.95  | 1.52  | 3.43  | 1.79  | 1.04  | 0.96  | 0.44  | 0.44  |

  

| B | Taxa                       | PS     |        |        |        |        |        |        |        |        | FS     |        |        |        |        |        |        |        |        |
|---|----------------------------|--------|--------|--------|--------|--------|--------|--------|--------|--------|--------|--------|--------|--------|--------|--------|--------|--------|--------|
|   |                            | E1     | E2     | E3     | E1     | E2     | E3     | E1     | E2     | E3     | E1     | E2     | E3     | E1     | E2     | E3     | E1     | E2     | E3     |
|   |                            | sandy1 | sandy1 | sandy1 | sandy2 | sandy2 | sandy2 | sandy3 | sandy3 | sandy3 | sandy1 | sandy1 | sandy1 | sandy2 | sandy2 | sandy2 | sandy3 | sandy3 | sandy3 |
|   | Bacteria; Proteobacteria   | 25.16  | 23.19  | 15.59  | 27.16  | 27.76  | 31.86  | 27.32  | 32.87  | 36.81  | 17.22  | 13.37  | 13.02  | 24.10  | 22.29  | 21.73  | 30.91  | 26.69  | 28.43  |
|   | Bacteria; Actinobacteria   | 23.69  | 18.21  | 13.35  | 23.40  | 17.51  | 26.17  | 7.07   | 12.33  | 13.72  | 19.41  | 15.89  | 18.99  | 24.06  | 27.51  | 33.33  | 12.52  | 14.63  | 22.08  |
|   | Bacteria; Acidobacteria    | 6.67   | 8.62   | 5.82   | 32.28  | 32.16  | 21.93  | 41.28  | 31.30  | 22.62  | 9.08   | 10.26  | 8.84   | 22.76  | 20.45  | 15.15  | 24.94  | 15.59  | 8.87   |
|   | Bacteria; Verrucomicrobia  | 6.42   | 4.14   | 4.57   | 1.46   | 1.85   | 0.75   | 3.64   | 2.61   | 3.52   | 9.16   | 15.93  | 11.10  | 2.85   | 1.48   | 0.88   | 5.47   | 4.38   | 1.52   |
|   | Bacteria; Firmicutes       | 15.24  | 28.27  | 44.33  | 0.15   | 0.45   | 0.56   | 0.11   | 0.34   | 0.82   | 14.41  | 17.79  | 20.24  | 0.19   | 0.40   | 1.07   | 0.59   | 0.89   | 1.80   |
|   | Bacteria; Chloroflexi      | 4.60   | 3.20   | 2.87   | 1.73   | 2.99   | 3.05   | 1.83   | 2.31   | 5.28   | 8.14   | 9.20   | 10.70  | 4.31   | 4.63   | 5.68   | 5.00   | 10.26  | 11.56  |
|   | Bacteria; Planctomycetes   | 3.36   | 2.75   | 3.08   | 2.56   | 6.66   | 4.83   | 2.06   | 2.82   | 5.79   | 4.80   | 5.71   | 8.19   | 7.36   | 7.33   | 8.41   | 3.95   | 8.85   | 9.60   |
|   | Archaea; Thaumarchaeota    | 1.86   | 1.32   | 1.98   | 0.38   | 0.55   | 0.59   | 4.54   | 2.62   | 1.35   | 5.92   | 3.91   | 3.72   | 1.43   | 1.37   | 0.97   | 7.06   | 4.10   | 2.61   |
|   | Bacteria; Nitrospirae      | 0.58   | 0.72   | 0.26   | 0.15   | 0.18   | 0.06   | 0.11   | 0.14   | 0.10   | 0.33   | 0.18   | 0.26   | 0.19   | 0.02   | 0.05   | 0.26   | 0.45   | 0.02   |
|   | Bacteria; Gemmatimonadetes | 2.09   | 1.73   | 0.93   | 0.24   | 0.24   | 0.29   | 0.18   | 0.12   | 0.10   | 1.36   | 0.87   | 0.97   | 0.15   | 0.11   | 0.12   | 0.24   | 0.16   | 0.08   |

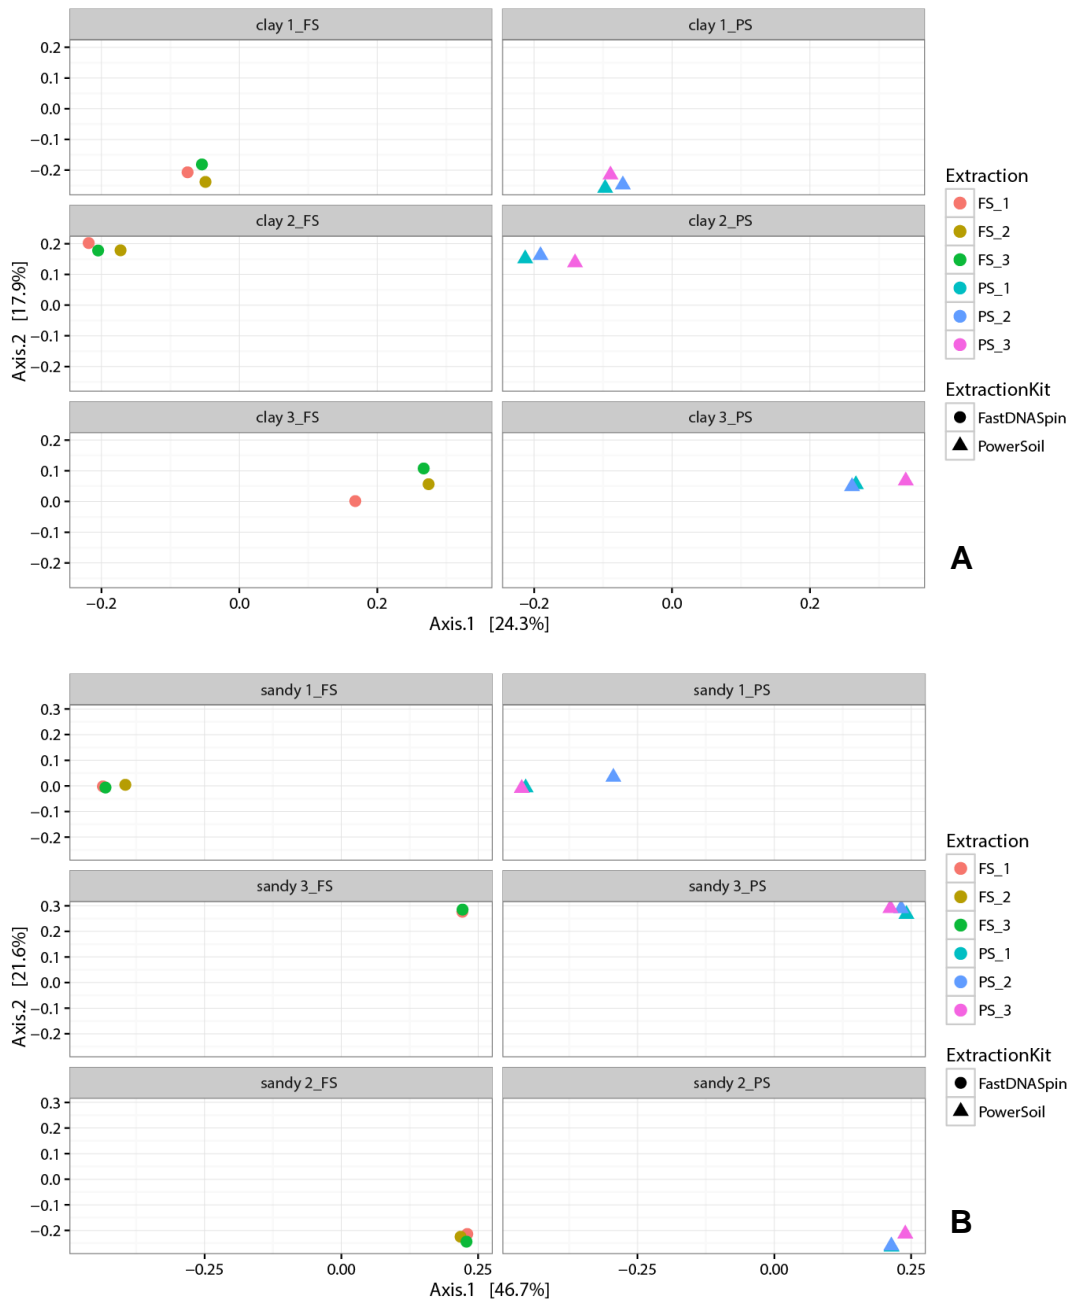

**Figure S6.** Multidimensional scaling (MDS) analysis of unweighted Unifrac values from fungal community in clay (A) and sandy soils (B).

**Table S4.** Archaeal phylum (A), bacterial phyla (B) and fungal phyla (C) observed only in E2 and/or E3.

**A**

| Phylum        | Soil sample                 |
|---------------|-----------------------------|
| Euryarchaeota | clay 1 (PS) and clay 3 (FS) |

**B**

| Phylum                 | Soil sample                               |
|------------------------|-------------------------------------------|
| BD1-5                  | sandy 1 (FS)                              |
| BHI80-139              | sandy 2 (FS)                              |
| Candidate_division_TM7 | sandy 1 (FS)                              |
| Chlorobi               | clay 3 (PS)                               |
| Cyanobacteria          | clay 3 (PS)                               |
| Deinococcus-Thermus    | clay 1 (PS) and sandy 1 (FS)              |
| Elusimicrobia          | clay 3 (PS)                               |
| Fibrobacteres          | clay 2 (FS)                               |
| Lentisphaerae          | clay 1 (FS), clay 3 (FS) and sandy 1 (FS) |
| SHA-109                | clay 2 (PS)                               |
| SM2F11                 | clay 2 (PS) and clay 1 (FS)               |
| TM6                    | clay 2 (PS)                               |
| Tenericutes            | clay 1 (PS)                               |
| Thermotogae            | sandy 2 (PS)                              |
| WCHB1-60               | clay 1 (PS) and clay 3 (FS)               |
| WD272                  | clay 1 (PS)                               |

**C**

| Phylum        | Soil sample                  |
|---------------|------------------------------|
| Glomeromycota | sandy 1 (FS)                 |
| Other         | clay 2 (FS) and sandy 2 (FS) |
| Unclassified  | clay 2 (FS)                  |

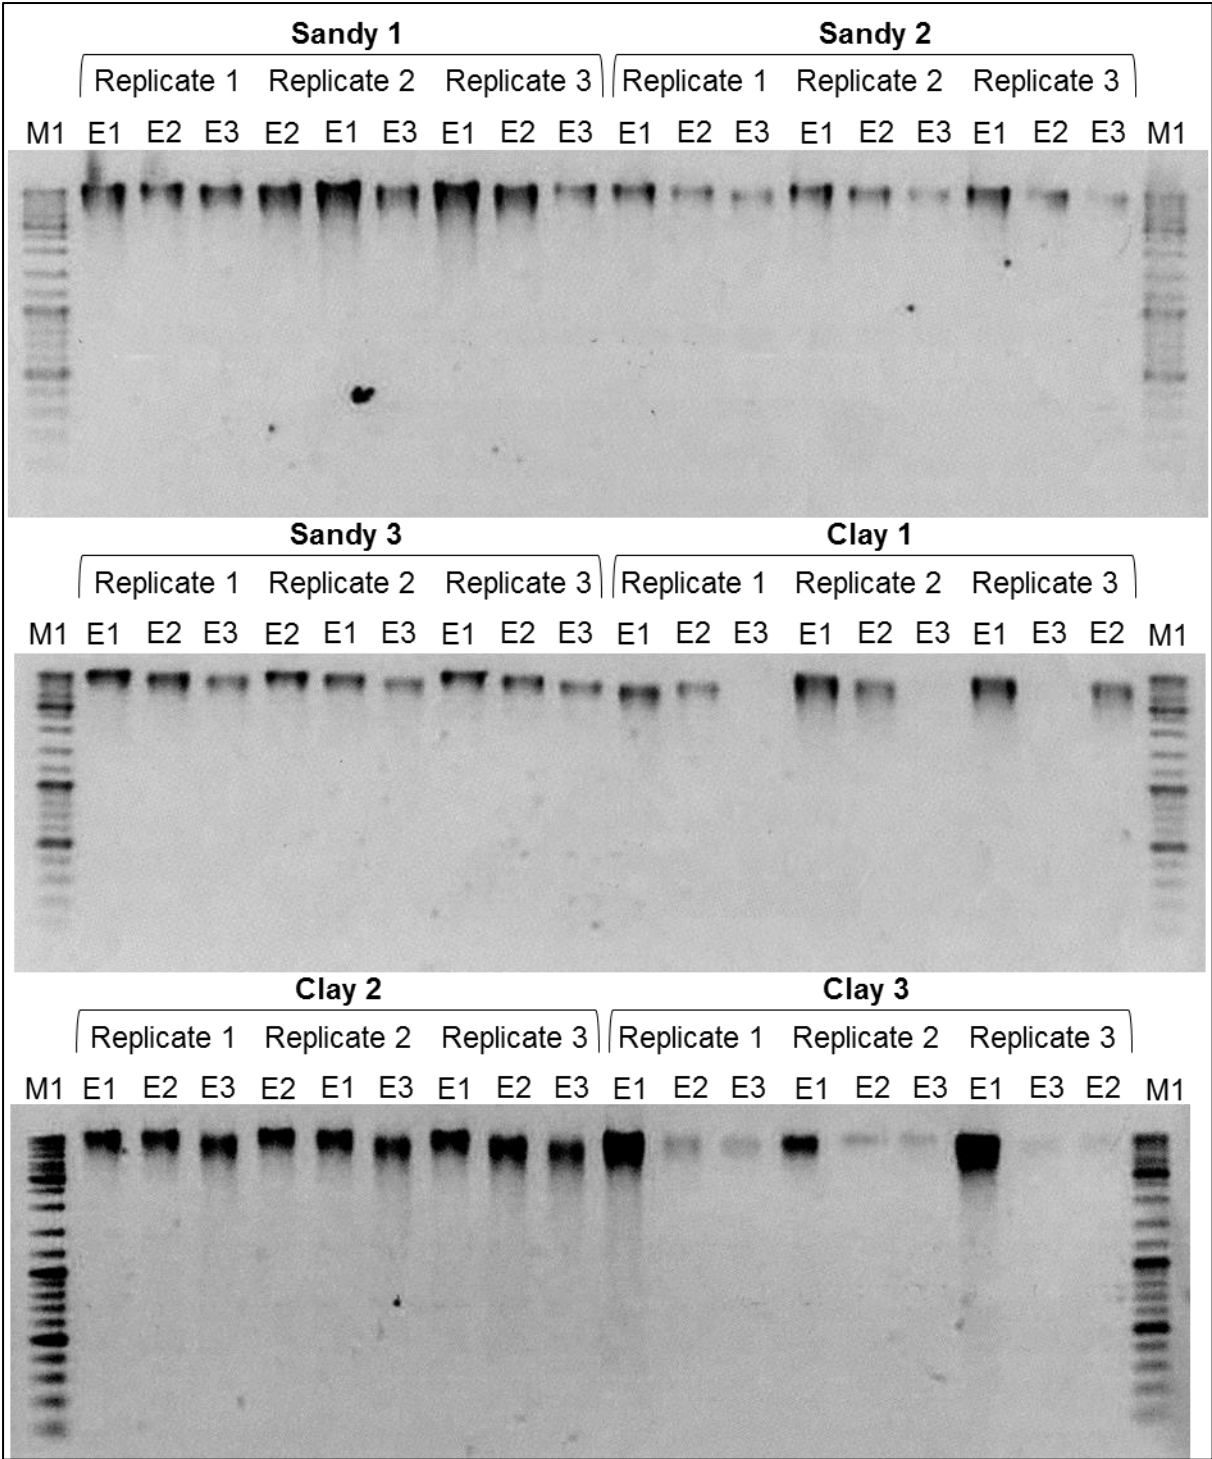

A

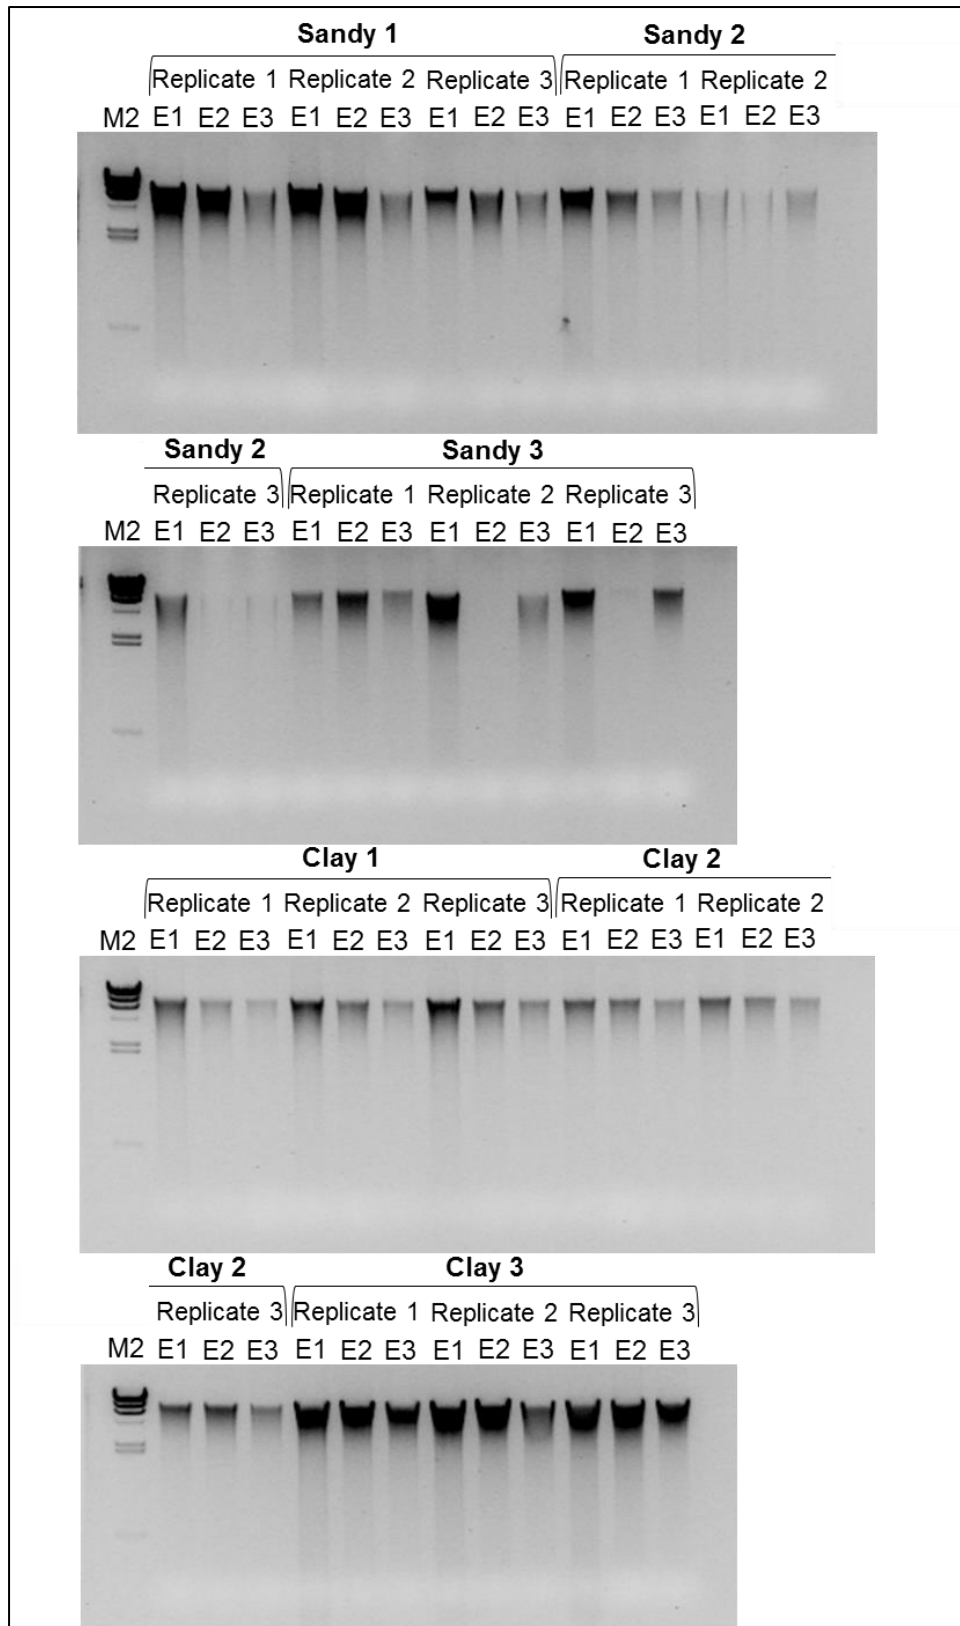

**Figure S7.** Visualization on agarose gel of the soil DNA extracted with PS (A) and FS (B). E = extraction, M1 = O'GeneRuler DNA Ladder Mix (Fermentas) and M2 = Lambda DNA/HindIII (Fermentas).

**Table S5.** Quality measurement (260/280 and 260/230 ratios) of DNA extracted with PS (A) and FS (B). Measurements were performed on NanoDrop 1000 spectrophotometer.

| <b>A</b>        |                |                |                  |                |                |
|-----------------|----------------|----------------|------------------|----------------|----------------|
| <b>Clay</b>     |                |                | <b>Sandy</b>     |                |                |
| <b>Samples</b>  | <b>260/280</b> | <b>260/230</b> | <b>Samples</b>   | <b>260/280</b> | <b>260/230</b> |
| E1_clay_1_PS_R1 | 1.76           | 1.19           | E1_sandy_1_PS_R1 | 1.84           | 1.57           |
| E2_clay_1_PS_R1 | 1.52           | 0.89           | E2_sandy_1_PS_R1 | 1.72           | 1.36           |
| E3_clay_1_PS_R1 | 1.23           | 0.50           | E3_sandy_1_PS_R1 | 1.62           | 0.96           |
| E1_clay_1_PS_R2 | 1.78           | 1.22           | E1_sandy_1_PS_R2 | 1.87           | 1.70           |
| E2_clay_1_PS_R2 | 1.69           | 1.09           | E2_sandy_1_PS_R2 | 1.79           | 1.38           |
| E3_clay_1_PS_R2 | 1.63           | 1.10           | E3_sandy_1_PS_R2 | 1.63           | 1.10           |
| E1_clay_1_PS_R3 | 1.81           | 1.04           | E1_sandy_1_PS_R3 | 1.85           | 1.47           |
| E2_clay_1_PS_R3 | 1.76           | 0.99           | E2_sandy_1_PS_R3 | 1.83           | 1.50           |
| E3_clay_1_PS_R3 | 1.37           | 0.32           | E3_sandy_1_PS_R3 | 1.63           | 0.97           |
| E1_clay_2_PS_R1 | 1.71           | 0.76           | E1_sandy_2_PS_R1 | 1.73           | 1.16           |
| E2_clay_2_PS_R1 | 1.73           | 0.77           | E2_sandy_2_PS_R1 | 1.52           | 0.80           |
| E3_clay_2_PS_R1 | 1.65           | 0.91           | E3_sandy_2_PS_R1 | 1.68           | 0.53           |
| E1_clay_2_PS_R2 | 1.69           | 0.59           | E1_sandy_2_PS_R2 | 1.70           | 0.92           |
| E2_clay_2_PS_R2 | 1.73           | 0.52           | E2_sandy_2_PS_R2 | 1.53           | 0.92           |
| E3_clay_2_PS_R2 | 1.57           | 0.86           | E3_sandy_2_PS_R2 | 1.52           | 0.64           |
| E1_clay_2_PS_R3 | 1.69           | 0.95           | E1_sandy_2_PS_R3 | 1.71           | 1.02           |
| E2_clay_2_PS_R3 | 1.74           | 0.93           | E2_sandy_2_PS_R3 | 1.63           | 0.74           |
| E3_clay_2_PS_R3 | 1.57           | 1.00           | E3_sandy_2_PS_R3 | 1.42           | 0.59           |
| E1_clay_3_PS_R1 | 1.87           | 1.63           | E1_sandy_3_PS_R1 | 1.65           | 1.17           |
| E2_clay_3_PS_R1 | 1.21           | 0.23           | E2_sandy_3_PS_R1 | 1.70           | 0.94           |
| E3_clay_3_PS_R1 | 1.31           | 0.49           | E3_sandy_3_PS_R1 | 1.61           | 1.00           |
| E1_clay_3_PS_R2 | 1.68           | 1.06           | E1_sandy_3_PS_R2 | 1.70           | 1.05           |
| E2_clay_3_PS_R2 | 1.47           | 0.27           | E2_sandy_3_PS_R2 | 1.68           | 0.77           |
| E3_clay_3_PS_R2 | 1.13           | 0.16           | E3_sandy_3_PS_R2 | 1.60           | 0.84           |
| E1_clay_3_PS_R3 | 1.89           | 1.70           | E1_sandy_3_PS_R3 | 1.67           | 1.02           |
| E2_clay_3_PS_R3 | 1.43           | 0.25           | E2_sandy_3_PS_R3 | 1.66           | 0.99           |
| E3_clay_3_PS_R3 | 1.31           | 0.28           | E3_sandy_3_PS_R3 | 1.56           | 0.72           |



**B**

| <b>Clay</b>     |                |                | <b>Sandy</b>     |                |                |
|-----------------|----------------|----------------|------------------|----------------|----------------|
| <b>Samples</b>  | <b>260/280</b> | <b>260/230</b> | <b>Samples</b>   | <b>260/280</b> | <b>260/230</b> |
| E1_clay_1_FS_R1 | 1.78           | 0.42           | E1_sandy_1_FS_R1 | 1.52           | 0.92           |
| E2_clay_1_FS_R1 | 1.50           | 0.22           | E2_sandy_1_FS_R1 | 1.51           | 0.76           |
| E3_clay_1_FS_R1 | 1.44           | 0.12           | E3_sandy_1_FS_R1 | 1.44           | 0.64           |
| E1_clay_1_FS_R2 | 1.83           | 0.47           | E1_sandy_1_FS_R2 | 1.49           | 0.69           |
| E2_clay_1_FS_R2 | 1.65           | 0.26           | E2_sandy_1_FS_R2 | 1.55           | 0.79           |
| E3_clay_1_FS_R2 | 1.48           | 0.11           | E3_sandy_1_FS_R2 | 1.39           | 0.61           |
| E1_clay_1_FS_R3 | 1.82           | 0.48           | E1_sandy_1_FS_R3 | 1.57           | 0.72           |
| E2_clay_1_FS_R3 | 1.59           | 0.22           | E2_sandy_1_FS_R3 | 1.43           | 0.60           |
| E3_clay_1_FS_R3 | 1.52           | 0.15           | E3_sandy_1_FS_R3 | 1.42           | 0.60           |
| E1_clay_2_FS_R1 | 1.78           | 0.18           | E1_sandy_2_FS_R1 | 1.54           | 0.67           |
| E2_clay_2_FS_R1 | 1.76           | 0.20           | E2_sandy_2_FS_R1 | 1.33           | 0.52           |
| E3_clay_2_FS_R1 | 1.57           | 0.10           | E3_sandy_2_FS_R1 | 1.44           | 0.38           |
| E1_clay_2_FS_R2 | 1.82           | 0.31           | E1_sandy_2_FS_R2 | 1.37           | 0.61           |
| E2_clay_2_FS_R2 | 1.80           | 0.08           | E2_sandy_2_FS_R2 | 1.36           | 0.63           |
| E3_clay_2_FS_R2 | 1.59           | 0.16           | E3_sandy_2_FS_R2 | 1.19           | 0.58           |
| E1_clay_2_FS_R3 | 1.85           | 0.39           | E1_sandy_2_FS_R3 | 1.33           | 0.73           |
| E2_clay_2_FS_R3 | 1.76           | 0.19           | E2_sandy_2_FS_R3 | 1.35           | 0.66           |
| E3_clay_2_FS_R3 | 1.56           | 0.13           | E3_sandy_2_FS_R3 | 1.31           | 0.63           |
| E1_clay_3_FS_R1 | 1.85           | 0.57           | E1_sandy_3_FS_R1 | 1.30           | 0.58           |
| E2_clay_3_FS_R1 | 1.78           | 0.32           | E2_sandy_3_FS_R1 | 1.27           | 0.65           |
| E3_clay_3_FS_R1 | 1.53           | 0.29           | E3_sandy_3_FS_R1 | 1.23           | 0.49           |
| E1_clay_3_FS_R2 | 1.86           | 0.63           | E1_sandy_3_FS_R2 | 1.33           | 0.57           |
| E2_clay_3_FS_R2 | 1.74           | 0.57           | E2_sandy_3_FS_R2 | 1.39           | 0.56           |
| E3_clay_3_FS_R2 | 1.47           | 0.56           | E3_sandy_3_FS_R2 | 1.38           | 0.61           |
| E1_clay_3_FS_R3 | 1.85           | 0.73           | E1_sandy_3_FS_R3 | 1.39           | 0.63           |
| E2_clay_3_FS_R3 | 1.74           | 0.43           | E2_sandy_3_FS_R3 | 1.13           | 0.53           |
| E3_clay_3_FS_R3 | 1.55           | 0.43           | E3_sandy_3_FS_R3 | 1.36           | 0.55           |

## References

Kuramae, E.E., Yergeau, E., Wong, L.C., Pijl, A.S., van Veen, J.A., Kowalchuk, G.A., 2012. Soil characteristics more strongly influence soil bacterial communities than land-use type. *FEMS Microbiol Ecol* 79, 12-24.
